# Supplementary material for: Pu-erh Tea Extract Treatment Could Be an Efficient Way to Enhance the Yield and Nutritional Value of Soybean Sprout
Source: Molecules. 2020 Aug 25;25(17):3869. doi: 10.3390/molecules25173869 (PMC7504710; doi:10.3390/molecules25173869)
Supplement: Supplementary file 1 [file molecules-25-03869-s001.xlsx]

## Sheet: Sheet1
Pu-erh Tea Extract Treatment could be an Efficient Way to Enhance the Yield and Nutritional Value of Soybean Sprout
Jeong-Ho Kim, Yong-Han Yoon, Il-Doo Kim, Sanjeev Kumar Dhungana and Dong-Hyun Shin
Supplementary Table S1: Analysis of variance for yield, moisture content, vitamin C content, color value, total free amino acid content, total mineral, total isoflavone, DPPH, SOD-like activity, total polyphenol content, and flavonoid content of Pu-erh tea extract-treated soybean sprouts grown for 6 days
Sources of variation	Yield					Moisture content					Vitamin C content					Color value															Total free amino acid content					Total mineral content					Total isoflavone content					DPPH inhibition
																L (lightness)					a (redness)					b (yellowness)
	DF	Sum of Squares	Mean Square	F Value	Pr > F	DF	Sum of Squares	Mean Square	F Value	Pr > F	DF	Sum of Squares	Mean Square	F Value	Pr > F	DF	Sum of Squares	Mean Square	F Value	Pr > F	DF	Sum of Squares	Mean Square	F Value	Pr > F	DF	Sum of Squares	Mean Square	F Value	Pr > F	DF	Sum of Squares	Mean Square	F Value	Pr > F	DF	Sum of Squares	Mean Square	F Value	Pr > F	DF	Sum of Squares	Mean Square	F Value	Pr > F	DF	Sum of Squares	Mean Square	F Value
Treatment	3	2718543	906181	518.34	<.0001	3	0.0250917	0.00836389	0.01	0.9982	3	9.1358	3.04527	61.29	<.0001	3	29.0171	9.67236	3.7	0.0417	3	0.548958	0.182986	36.72	<.0001	3	42.6099	14.2033	7.08	0.0122	3	25.187	8.39567	106.59	0.0003	3	4.79874e+06	1.59958e+06	46.84	<.0001	3	68862.1	22954	122.78	<.0001	3	95.5653	31.8551	22.33
Error	8	13986	1748.25			8	5.92773	0.740967			8	0.397467	0.0496833			8	20.9124	2.61405			8	0.0398667	0.00498333			8	16.052	2.0065			4	0.315053	0.0787633			8	273207	34150.9			8	1495.66	186.958			8	11.4148	1.42686
Corrected Total	11	2732529				11	5.95282				11	9.53327				11	49.9295				11	0.588825				11	58.6619				7	25.5021				11	5.07195e+06				11	70357.7				11	106.98
DF: degrees of freedom
[truncated: 16 more columns]
